# Supplementary material for: DrosophilaKette coordinates myoblast junction dissolution and the ratio of Scar-to-WASp during myoblast fusion
Source: Oxford University Press journal article supplement (doi:10.1242/jcs.175638), 2016-08-13
Supplement: jcs175638supp.pdf [file jcs175638supp.pdf]

## Supplement information

### Ultrastructural features between myoblasts using conventional chemical fixation

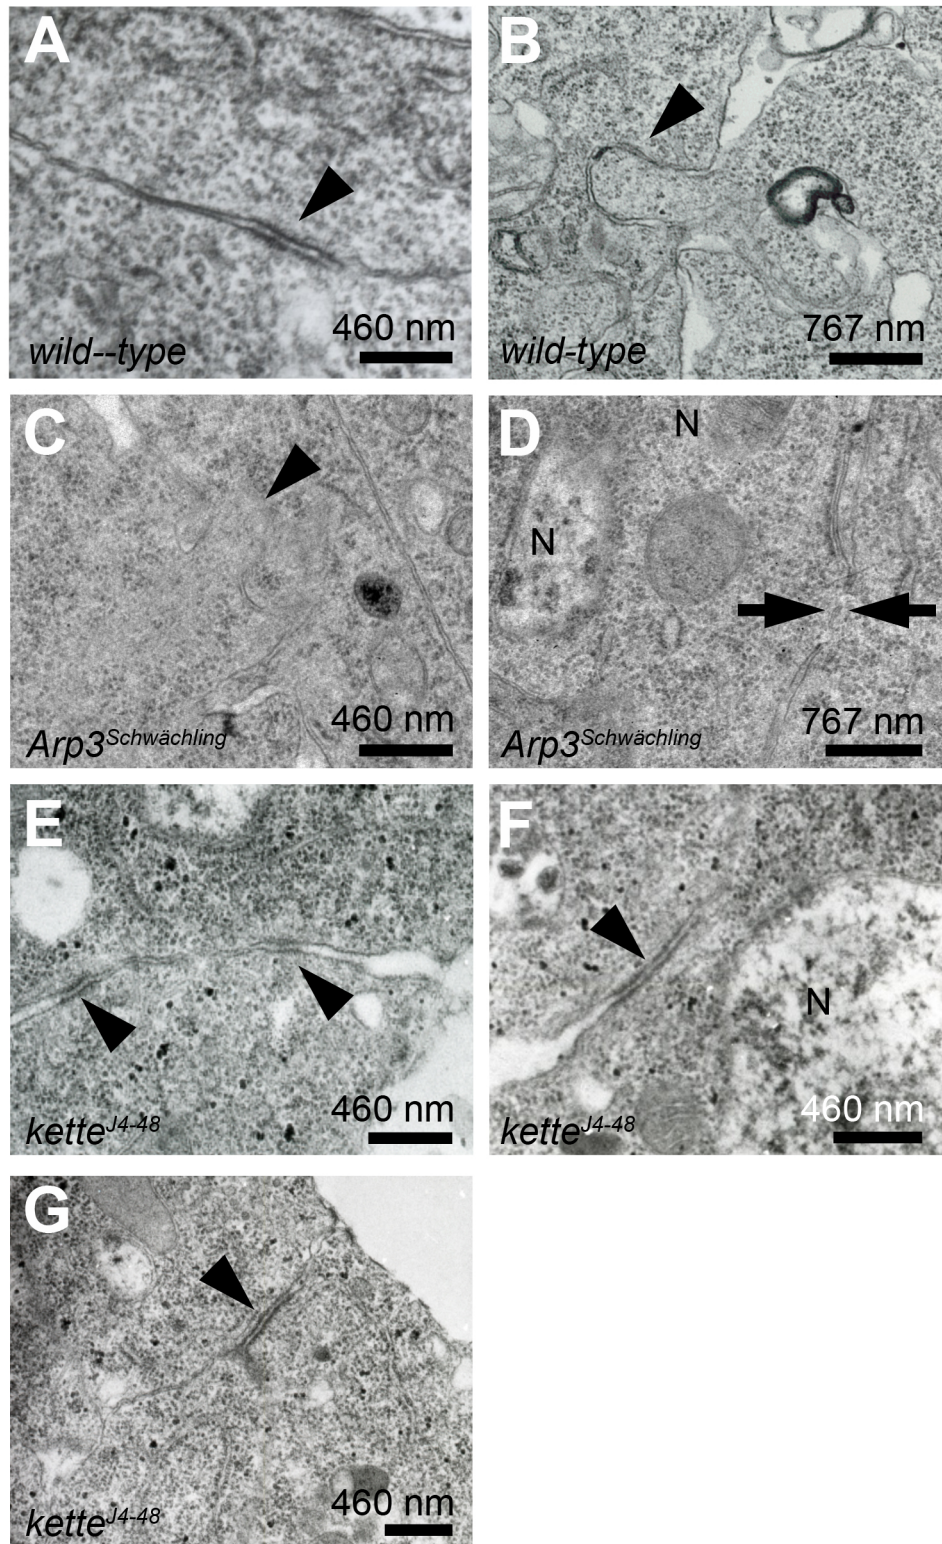

**Figure S1** Electron-dense plaques are the most prominent ultrastructural features observed in *kette* mutants.

(A–G) Electron micrographs of stage 14 embryos. Embryos were fixed by using conventional chemical fixation. (A–B) Wild-type myoblasts showing (A) an electron-dense plaque (arrowhead) between adhering myoblasts, and (B) the projection of a finger-like protrusion from one myoblast into the other (arrowhead). In homozygous *Arp3*<sup>Schwächling</sup> mutants, (C) finger-like protrusions projecting from one myoblast into the other (arrowhead). (D) However, more frequently, a small fusion pore is observed between myoblasts (arrows). (E–G) Homozygous *kette*<sup>J4-48</sup> mutants. (E) Two electron-dense plaques that measure 200 nm in length between aligning myoblasts (arrowheads). (F) Electron-dense plaque of 1 µm between adhering myoblasts (arrowhead). (G) Adherence junction between epithelial cells (arrowhead).



Expression of N-cadherin expression in wild-type and *kette* mutant embryos; zygotic *abi* mutants and embryos expressing *Sra1<sup>Myr</sup>*, *Sra1ΔC<sup>Myr</sup>* and *waspRNAi* do not show a myoblast fusion phenotype

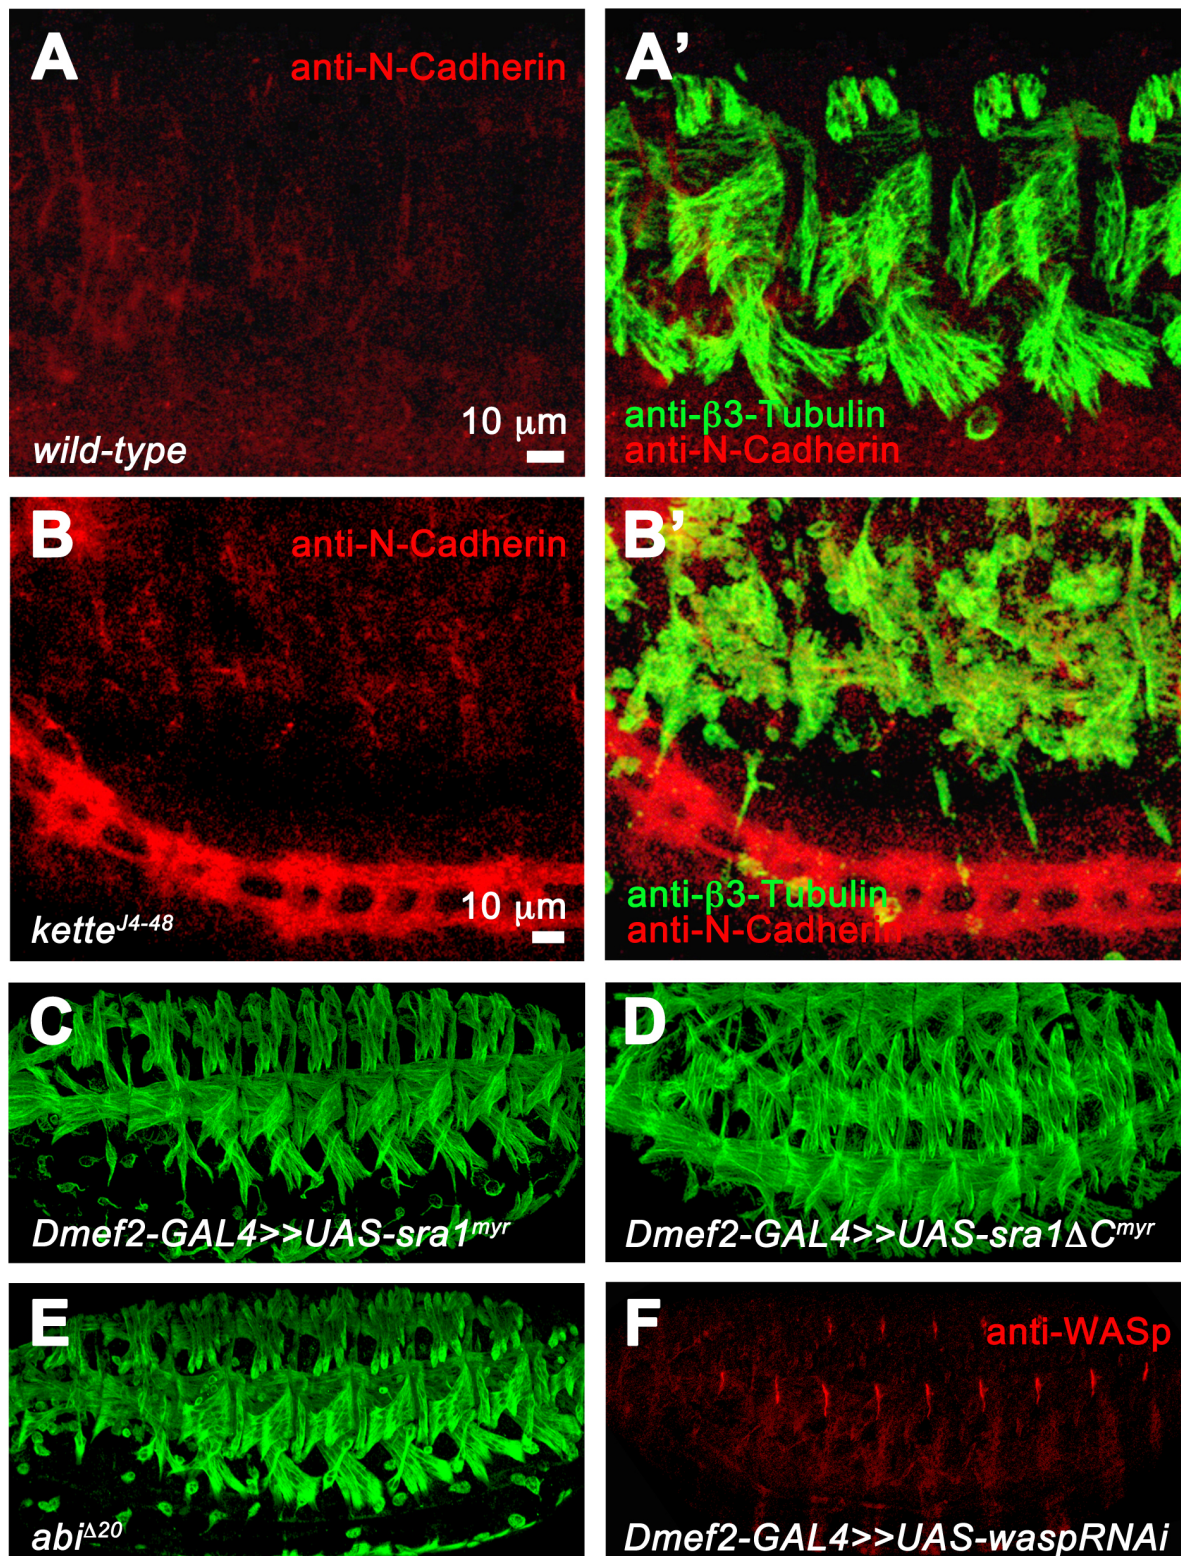

Fig. S2 N-cadherin expression persists in *kette* mutants and *Sra1ΔC<sup>Myr</sup>* expressing embryos and *abi* mutants do not show a *kette*-like phenotype

(A–B') Magnification of stage 16 embryos stained with anti-N-cadherin (red) and anti- $\beta$ 3-Tubulin (green) to visualize myoblasts and mini-muscles. (A, A') N-cadherin is not detectable at stage 16 in *kette*<sup>J4-48</sup>/TM3 deformed-lacZ embryos (arrowhead). (B, B') N-cadherin is present at the membrane of a thin mini-muscle and an unfused myoblast (arrowheads). (C–E) Lateral view of stage 16 embryos stained with anti- $\beta$ 3-Tubulin. (C) Expression of UAS-*sraI*<sup>myr</sup> and (D) UAS-*sraI* $\Delta$ C<sup>myr</sup> in FCs and FCMs. (E) Homozygous *abi* <sup>$\Delta$ 20</sup> null mutant. (F) Anti-WASp staining of a stage 16 embryo expressing UAS-*waspRNAi* driven by *Dmef2*-GAL4 in FCs and FCMs. WASp is still present in muscles and at attachment sites.

**Table S1. Number of embryos and sections analysed by transmission electron microscopy.**

| Genotype                                                   | Number of embryos | Number of electron-dense plaques per section (number of sections) | Length of the electron-dense plaques (number of electron-dense plaques) | Number of finger-like protrusions per section (number of sections) | Number of fusion pores per section (number of sections) |
|------------------------------------------------------------|-------------------|-------------------------------------------------------------------|-------------------------------------------------------------------------|--------------------------------------------------------------------|---------------------------------------------------------|
| Wild-type                                                  | 4                 | 4 (20)                                                            | 500 nm (4)                                                              | 1 (20)                                                             | 2 (20)                                                  |
| <i>kette</i> <sup>J4-48</sup>                              | 4                 | 4 (18)                                                            | 200 nm (2)<br>1 µm (2)                                                  | 0 (18)                                                             | 0 (20)                                                  |
| <i>scar</i> <sup>Δ37</sup><br><i>vrp</i> <sup>f06715</sup> | 6                 | 0 (25)                                                            | —                                                                       | 0 (25)                                                             | 3 (25)                                                  |
| <i>Arp3</i> <sup>Schwächling</sup>                         | 6                 | 1 (25)                                                            | 200 nm (1)                                                              | 1 (25)                                                             | 5 (25)                                                  |
| High-pressure freezing/freeze substitution                 |                   |                                                                   |                                                                         |                                                                    |                                                         |
| Wild-type                                                  | 3                 | 0 (12)                                                            | —                                                                       | 2 (4)                                                              | 0 (4)                                                   |
| <i>kette</i> <sup>J4-48</sup>                              | 2                 | 3 (8)                                                             | 1 µm (3)                                                                | 3 (4)                                                              | 0 (4)                                                   |
